# Supplementary material for: Nobiletin Alleviates Non-alcoholic Steatohepatitis in MCD-Induced Mice by Regulating Macrophage Polarization
Source: Frontiers journal article supplement (doi:10.3389/fphys.2021.687744), 2021-05-20
Supplement: Image_1.pdf [file Image_1.pdf]

## Supplementary Material

### Supplementary Figures

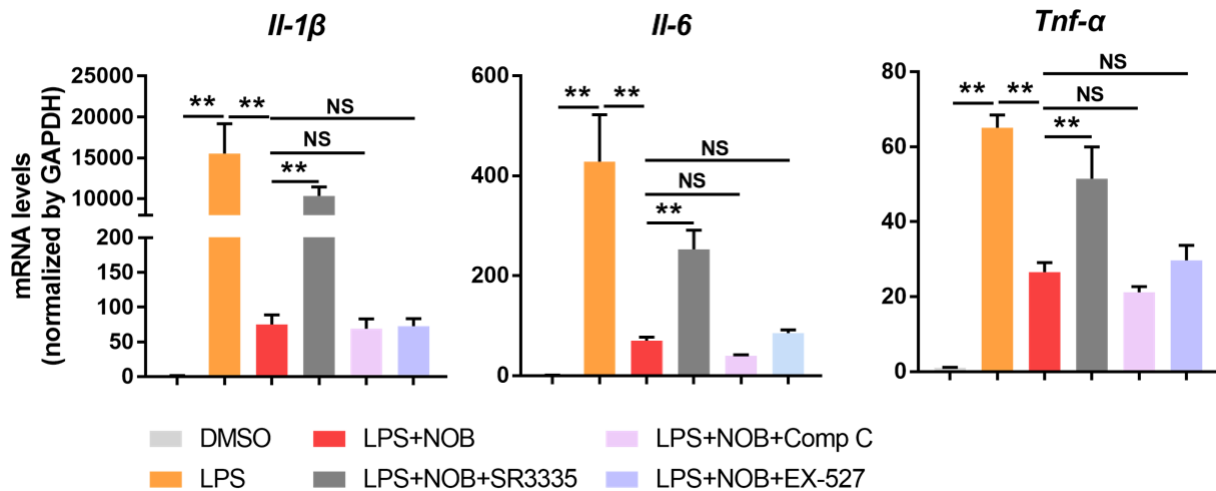

**Supplementary Figure 1. The suppressive effect of NOB on the expression of pro-inflammatory cytokines was not affected by inhibition of AMPK and SIRT1.** RAW 264.7 cells were pretreated with DMSO, LPS (200 ng/mL), LPS (200 ng/mL) + NOB (100  $\mu$ M), LPS (200 ng/mL) + NOB (100  $\mu$ M) + SR3335 (10  $\mu$ M), LPS (200 ng/mL) + NOB (100  $\mu$ M) + Compound C (Comp C, 100 nM, AMPK inhibitor), or LPS (200 ng/mL) + NOB (100  $\mu$ M) + EX-527 (100 nM, SIRT1 inhibitor) for 16 h. Proinflammatory factors *IL-6*, *IL-1β* and *Tnf-α* determined by RT-qPCR. Values are expressed as mean  $\pm$  SD (n = 3). \*\*  $P < 0.01$ .
